# Supplementary material
Source: publisher figshare collection journal article supplement (https://acs.figshare.com/ndownloader/files/4920955)
Supplement: Supplementary file 1 [file 4920955]

 
data_FJI-C4
 
_audit_creation_method            SHELXL-97 
_chemical_name_systematic 
; 
 ? 
; 
_chemical_name_common             ? 
_chemical_melting_point           ? 
_chemical_formula_moiety          ? 
_chemical_formula_sum 
 'C16 H6 N0 O10 P Zn2' 
_chemical_formula_weight          519.92 
 
loop_ 
 _atom_type_symbol 
 _atom_type_description 
 _atom_type_scat_dispersion_real 
 _atom_type_scat_dispersion_imag 
 _atom_type_scat_source 
 'C'  'C'   0.0181   0.0091 
 'International Tables Vol C Tables 4.2.6.8 and 6.1.1.4' 
 'H'  'H'   0.0000   0.0000 
 'International Tables Vol C Tables 4.2.6.8 and 6.1.1.4' 
 'N'  'N'   0.0311   0.0180 
 'International Tables Vol C Tables 4.2.6.8 and 6.1.1.4' 
 'O'  'O'   0.0492   0.0322 
 'International Tables Vol C Tables 4.2.6.8 and 6.1.1.4' 
 'P'  'P'   0.2955   0.4335 
 'International Tables Vol C Tables 4.2.6.8 and 6.1.1.4' 
 'Zn'  'Zn'  -1.5491   0.6778 
 'International Tables Vol C Tables 4.2.6.8 and 6.1.1.4' 
 
_symmetry_cell_setting            orthorhombic 
_symmetry_space_group_name_H-M    'P bc n ' 
 
loop_ 
 _symmetry_equiv_pos_as_xyz 
 'x, y, z' 
 '-x+1/2, -y+1/2, z+1/2' 
 'x+1/2, -y+1/2, -z' 
 '-x, y, -z+1/2' 
 '-x, -y, -z' 
 'x-1/2, y-1/2, -z-1/2' 
 '-x-1/2, y-1/2, z' 
 'x, -y, z-1/2' 
 
_cell_length_a                    10.7239(3) 
_cell_length_b                    15.3597(3) 
_cell_length_c                    17.7316(3) 
_cell_angle_alpha                 90.00 
_cell_angle_beta                  90.00 
_cell_angle_gamma                 90.00 
_cell_volume                      2920.68(11) 
_cell_formula_units_Z             4 
_cell_measurement_temperature     173(2) 
_cell_measurement_reflns_used     2925 
_cell_measurement_theta_min       4.9810 
_cell_measurement_theta_max       72.9030 
 
_exptl_crystal_description        rod 
_exptl_crystal_colour             colorless 
_exptl_crystal_size_max           0.20 
_exptl_crystal_size_mid           0.10 
_exptl_crystal_size_min           0.09 
_exptl_crystal_density_meas       ? 
_exptl_crystal_density_diffrn     1.182 
_exptl_crystal_density_method     'not measured' 
_exptl_crystal_F_000              1028 
_exptl_absorpt_coefficient_mu     2.868 
_exptl_absorpt_correction_type    'multi-scan' 
_exptl_absorpt_correction_T_min   0.5977 
_exptl_absorpt_correction_T_max   0.7823 
_exptl_absorpt_process_details    
;
CrysAlisPro, Agilent Technologies,
Version 1.171.37.35 (release 13-08-2014 CrysAlis171 .NET)
(compiled Aug 13 2014,18:06:01)
Empirical absorption correction using spherical harmonics,
 implemented in SCALE3 ABSPACK scaling algorithm.
; 
 
_exptl_special_details 
; 
 Refinement of F^2^ against ALL reflections.  The weighted R-factor wR and 
 goodness of fit S are based on F^2^, conventional R-factors R are based 
 on F, with F set to zero for negative F^2^. The threshold expression of 
 F^2^ > 2sigma(F^2^) is used only for calculating R-factors(gt) etc. and is 
 not relevant to the choice of reflections for refinement.  R-factors based 
 on F^2^ are statistically about twice as large as those based on F, and R- 
 factors based on ALL data will be even larger.

The calculated free volume of FJI-C4 with removal of guest solvent molecules and disorder 
dimethyammonium cations is 52.1% by PLATON (1.8 Angstrom probe radius). We employed 
PLATON SQUEEZE to calculate the contribution to the contribution to the diffraction 
from the solvent region and thereby produced a set of solvent-free diffraction intensities. 
The final formula was calculated from TGA and  elemental analysis data.
; 
 
_diffrn_ambient_temperature       173(2) 
_diffrn_radiation_wavelength      1.54184 
_diffrn_radiation_type            CuK\a 
_diffrn_radiation_source          'fine-focus sealed tube' 
_diffrn_radiation_monochromator   graphite 
_diffrn_measurement_device_type   'SuperNova, Dual, Cu at zero, Atlas' 
_diffrn_measurement_method        '\w scans' 
_diffrn_detector_area_resol_mean  10.5594 
_diffrn_standards_number          ? 
_diffrn_standards_interval_count  ? 
_diffrn_standards_interval_time   ? 
_diffrn_standards_decay_%         ? 
_diffrn_reflns_number             7507 
_diffrn_reflns_av_R_equivalents   0.0286 
_diffrn_reflns_av_sigmaI/netI     0.0327 
_diffrn_reflns_limit_h_min        -12 
_diffrn_reflns_limit_h_max        9 
_diffrn_reflns_limit_k_min        -18 
_diffrn_reflns_limit_k_max        15 
_diffrn_reflns_limit_l_min        -21 
_diffrn_reflns_limit_l_max        18 
_diffrn_reflns_theta_min          4.99 
_diffrn_reflns_theta_max          73.47 
_reflns_number_total              2862 
_reflns_number_gt                 2368 
_reflns_threshold_expression      >2sigma(I) 
 
_computing_data_collection        
;
CrysAlisPro, Agilent Technologies,
Version 1.171.37.35 (release 13-08-2014 CrysAlis171 .NET)
(compiled Aug 13 2014,18:06:01)
; 
_computing_cell_refinement        
;
CrysAlisPro, Agilent Technologies,
Version 1.171.37.35 (release 13-08-2014 CrysAlis171 .NET)
(compiled Aug 13 2014,18:06:01)
; 
_computing_data_reduction         
;
CrysAlisPro, Agilent Technologies,
Version 1.171.37.35 (release 13-08-2014 CrysAlis171 .NET)
(compiled Aug 13 2014,18:06:01)
;
_computing_structure_solution     'SHELXS-97 (Sheldrick, 1990)' 
_computing_structure_refinement   'SHELXL-97 (Sheldrick, 1997)' 
_computing_molecular_graphics     ? 
_computing_publication_material   ? 
 
_refine_special_details 
; 
 Refinement of F^2^ against ALL reflections.  The weighted R-factor wR and 
 goodness of fit S are based on F^2^, conventional R-factors R are based 
 on F, with F set to zero for negative F^2^. The threshold expression of 
 F^2^ > 2sigma(F^2^) is used only for calculating R-factors(gt) etc. and is 
 not relevant to the choice of reflections for refinement.  R-factors based 
 on F^2^ are statistically about twice as large as those based on F, and R- 
 factors based on ALL data will be even larger. 
; 
 
_refine_ls_structure_factor_coef  Fsqd  
_refine_ls_matrix_type            full 
_refine_ls_weighting_scheme       calc  
_refine_ls_weighting_details 
 'calc w=1/[\s^2^(Fo^2^)+(0.0443P)^2^+0.4514P] where P=(Fo^2^+2Fc^2^)/3' 
_atom_sites_solution_primary      direct 
_atom_sites_solution_secondary    difmap 
_atom_sites_solution_hydrogens    geom 
_refine_ls_hydrogen_treatment     mixed 
_refine_ls_extinction_method      none 
_refine_ls_extinction_coef        ? 
_refine_ls_number_reflns          2862 
_refine_ls_number_parameters      132 
_refine_ls_number_restraints      0 
_refine_ls_R_factor_all           0.0398 
_refine_ls_R_factor_gt            0.0324 
_refine_ls_wR_factor_ref          0.0861 
_refine_ls_wR_factor_gt           0.0831 
_refine_ls_goodness_of_fit_ref    1.063 
_refine_ls_restrained_S_all       1.063 
_refine_ls_shift/su_max           0.001 
_refine_ls_shift/su_mean          0.000 
 
loop_ 
 _atom_site_label 
 _atom_site_type_symbol 
 _atom_site_fract_x 
 _atom_site_fract_y 
 _atom_site_fract_z 
 _atom_site_U_iso_or_equiv 
 _atom_site_adp_type 
 _atom_site_occupancy 
 _atom_site_symmetry_multiplicity 
 _atom_site_calc_flag 
 _atom_site_refinement_flags 
 _atom_site_disorder_assembly 
 _atom_site_disorder_group 
Zn1 Zn 0.42798(3) 0.650197(19) 0.842661(14) 0.02254(11) Uani 1 1 d . . . 
P1 P 0.0000 0.98466(5) 0.7500 0.02241(17) Uani 1 2 d S . . 
O3 O -0.09269(16) 1.03624(11) 0.70388(9) 0.0275(3) Uani 1 1 d . . . 
O6 O 0.0158(2) 0.90007(13) 0.45768(9) 0.0468(5) Uani 1 1 d . . . 
O2 O 0.3376(2) 0.73382(12) 0.77744(9) 0.0385(5) Uani 1 1 d . . . 
O1 O 0.40308(19) 0.69904(14) 0.66143(9) 0.0405(5) Uani 1 1 d . . . 
O4 O 0.1803(2) 0.82279(15) 0.43673(9) 0.0456(5) Uani 1 1 d . . . 
C8 C 0.1103(3) 0.86166(16) 0.48113(13) 0.0375(6) Uani 1 1 d . . . 
C2 C 0.2430(2) 0.80216(15) 0.67338(12) 0.0281(5) Uani 1 1 d . . . 
C1 C 0.3356(3) 0.73993(16) 0.70675(12) 0.0313(5) Uani 1 1 d . . . 
C4 C 0.1372(3) 0.86137(15) 0.56458(12) 0.0315(5) Uani 1 1 d . . . 
C3 C 0.2260(3) 0.80540(15) 0.59500(12) 0.0314(5) Uani 1 1 d . . . 
H3 H 0.2749 0.7696 0.5628 0.038 Uiso 1 1 calc R . . 
C6 C 0.0870(2) 0.91396(15) 0.68903(12) 0.0251(4) Uani 1 1 d . . . 
C7 C 0.1728(2) 0.85601(15) 0.71964(11) 0.0268(5) Uani 1 1 d . . . 
H7 H 0.1834 0.8533 0.7728 0.032 Uiso 1 1 calc R . . 
C5 C 0.0686(2) 0.91564(15) 0.61101(12) 0.0283(5) Uani 1 1 d . . . 
H5 H 0.0087 0.9541 0.5898 0.034 Uiso 1 1 calc R . . 
 
loop_ 
 _atom_site_aniso_label 
 _atom_site_aniso_U_11 
 _atom_site_aniso_U_22 
 _atom_site_aniso_U_33 
 _atom_site_aniso_U_23 
 _atom_site_aniso_U_13 
 _atom_site_aniso_U_12 
Zn1 0.03195(18) 0.02281(16) 0.01286(15) 0.00044(10) 0.00006(11) 0.00215(12) 
P1 0.0278(4) 0.0203(3) 0.0191(3) 0.000 -0.0010(3) 0.000 
O3 0.0288(8) 0.0281(8) 0.0256(7) 0.0046(6) -0.0013(6) 0.0003(7) 
O6 0.0715(14) 0.0439(11) 0.0249(8) 0.0025(8) -0.0172(9) 0.0074(11) 
O2 0.0589(12) 0.0382(9) 0.0183(7) 0.0034(7) -0.0003(8) 0.0206(9) 
O1 0.0489(11) 0.0484(11) 0.0241(8) -0.0060(8) -0.0030(8) 0.0214(9) 
O4 0.0585(12) 0.0588(12) 0.0196(7) -0.0002(8) -0.0011(8) 0.0083(11) 
C8 0.0653(18) 0.0256(11) 0.0214(11) -0.0001(9) -0.0022(12) -0.0041(12) 
C2 0.0380(13) 0.0284(11) 0.0179(9) 0.0018(8) 0.0012(9) 0.0035(10) 
C1 0.0420(14) 0.0315(12) 0.0204(10) -0.0019(9) -0.0006(10) 0.0099(11) 
C4 0.0515(15) 0.0260(11) 0.0171(10) 0.0013(8) -0.0044(10) -0.0016(11) 
C3 0.0487(14) 0.0272(11) 0.0182(10) -0.0027(8) 0.0014(9) 0.0066(11) 
C6 0.0340(12) 0.0229(10) 0.0183(9) -0.0001(8) -0.0016(8) -0.0012(9) 
C7 0.0372(12) 0.0285(11) 0.0147(9) 0.0012(8) -0.0006(9) 0.0019(10) 
C5 0.0417(13) 0.0206(10) 0.0226(10) 0.0014(8) -0.0056(9) -0.0004(10) 
 
_geom_special_details 
; 
 All esds (except the esd in the dihedral angle between two l.s. planes) 
 are estimated using the full covariance matrix.  The cell esds are taken 
 into account individually in the estimation of esds in distances, angles 
 and torsion angles; correlations between esds in cell parameters are only 
 used when they are defined by crystal symmetry.  An approximate (isotropic) 
 treatment of cell esds is used for estimating esds involving l.s. planes. 
; 
 
loop_ 
 _geom_bond_atom_site_label_1 
 _geom_bond_atom_site_label_2 
 _geom_bond_distance 
 _geom_bond_site_symmetry_2 
 _geom_bond_publ_flag 
Zn1 O3 1.9479(16) 6_657 ? 
Zn1 O1 1.962(2) 4_656 ? 
Zn1 O2 1.9813(17) . ? 
Zn1 O4 2.0744(19) 2_565 ? 
Zn1 O6 2.2624(19) 2_565 ? 
Zn1 C8 2.496(2) 2_565 ? 
P1 O3 1.5114(17) 4_556 ? 
P1 O3 1.5114(16) . ? 
P1 C6 1.794(2) 4_556 ? 
P1 C6 1.794(2) . ? 
O3 Zn1 1.9479(16) 6_567 ? 
O6 C8 1.244(4) . ? 
O6 Zn1 2.2625(19) 2_564 ? 
O2 C1 1.257(3) . ? 
O1 C1 1.250(3) . ? 
O1 Zn1 1.9622(19) 4_656 ? 
O4 C8 1.241(4) . ? 
O4 Zn1 2.0744(19) 2_564 ? 
C8 C4 1.508(3) . ? 
C8 Zn1 2.496(2) 2_564 ? 
C2 C7 1.387(3) . ? 
C2 C3 1.403(3) . ? 
C2 C1 1.501(3) . ? 
C4 C5 1.384(4) . ? 
C4 C3 1.392(4) . ? 
C6 C7 1.391(3) . ? 
C6 C5 1.398(3) . ? 
 
loop_ 
 _geom_angle_atom_site_label_1 
 _geom_angle_atom_site_label_2 
 _geom_angle_atom_site_label_3 
 _geom_angle 
 _geom_angle_site_symmetry_1 
 _geom_angle_site_symmetry_3 
 _geom_angle_publ_flag 
O3 Zn1 O1 115.66(8) 6_657 4_656 ? 
O3 Zn1 O2 106.24(7) 6_657 . ? 
O1 Zn1 O2 100.49(9) 4_656 . ? 
O3 Zn1 O4 117.17(8) 6_657 2_565 ? 
O1 Zn1 O4 118.05(8) 4_656 2_565 ? 
O2 Zn1 O4 93.78(8) . 2_565 ? 
O3 Zn1 O6 96.06(7) 6_657 2_565 ? 
O1 Zn1 O6 85.28(8) 4_656 2_565 ? 
O2 Zn1 O6 151.36(7) . 2_565 ? 
O4 Zn1 O6 59.51(8) 2_565 2_565 ? 
O3 Zn1 C8 109.42(7) 6_657 2_565 ? 
O1 Zn1 C8 102.48(9) 4_656 2_565 ? 
O2 Zn1 C8 122.76(9) . 2_565 ? 
O4 Zn1 C8 29.73(9) 2_565 2_565 ? 
O6 Zn1 C8 29.79(9) 2_565 2_565 ? 
O3 P1 O3 116.78(13) 4_556 . ? 
O3 P1 C6 109.46(9) 4_556 4_556 ? 
O3 P1 C6 107.54(10) . 4_556 ? 
O3 P1 C6 107.54(10) 4_556 . ? 
O3 P1 C6 109.46(9) . . ? 
C6 P1 C6 105.49(15) 4_556 . ? 
P1 O3 Zn1 128.71(10) . 6_567 ? 
C8 O6 Zn1 85.56(16) . 2_564 ? 
C1 O2 Zn1 129.69(17) . . ? 
C1 O1 Zn1 138.58(17) . 4_656 ? 
C8 O4 Zn1 94.31(17) . 2_564 ? 
O4 C8 O6 120.6(2) . . ? 
O4 C8 C4 120.3(3) . . ? 
O6 C8 C4 119.1(2) . . ? 
O4 C8 Zn1 55.97(13) . 2_564 ? 
O6 C8 Zn1 64.65(13) . 2_564 ? 
C4 C8 Zn1 175.37(19) . 2_564 ? 
C7 C2 C3 119.7(2) . . ? 
C7 C2 C1 120.41(19) . . ? 
C3 C2 C1 119.9(2) . . ? 
O1 C1 O2 126.4(2) . . ? 
O1 C1 C2 116.7(2) . . ? 
O2 C1 C2 116.9(2) . . ? 
C5 C4 C3 120.4(2) . . ? 
C5 C4 C8 118.7(2) . . ? 
C3 C4 C8 120.9(2) . . ? 
C4 C3 C2 119.6(2) . . ? 
C7 C6 C5 119.4(2) . . ? 
C7 C6 P1 119.76(16) . . ? 
C5 C6 P1 120.79(18) . . ? 
C2 C7 C6 120.66(19) . . ? 
C4 C5 C6 120.2(2) . . ? 
 
_diffrn_measured_fraction_theta_max    0.973 
_diffrn_reflns_theta_full              73.47 
_diffrn_measured_fraction_theta_full   0.972 
_refine_diff_density_max    0.606 
_refine_diff_density_min   -0.380 
_refine_diff_density_rms    0.062

# SQUEEZE RESULTS (APPEND TO CIF)
# Note: Data are Listed for all Voids in the P1 Unit Cell
# i.e. Centre of Gravity, Solvent Accessible Volume,
# Recovered number of Electrons in the Void and
# Details about the Squeezed Material
loop_
  _platon_squeeze_void_nr
  _platon_squeeze_void_average_x
  _platon_squeeze_void_average_y
  _platon_squeeze_void_average_z
  _platon_squeeze_void_volume
  _platon_squeeze_void_count_electrons
  _platon_squeeze_void_content
   1 -0.142  0.283  0.135      1511       436 ' '
_platon_squeeze_details
;
; 
